# Supplementary material for: Highly sensitive detection of caspase-3 activity based on peptide-modified organic electrochemical transistor biosensors
Source: Royal Society of Chemistry journal article supplement (doi:10.1039/d0nr08453k), 2020-12-26
Supplement: d0nr08453k1.pdf [file d0nr08453k1.pdf]

**Supporting Information for**  
**Highly sensitive detection of caspase-3 activity based on peptide-modified**  
**organic electrochemical transistors**

*Ji Yu,<sup>a,b</sup> Anneng Yang,<sup>b</sup> Naixiang Wang,<sup>b</sup> Haifeng Ling,<sup>b</sup> Jiajun Song,<sup>b</sup> Xi Chen,<sup>a</sup>  
Yadong Lian,<sup>a</sup> Zhishan Zhang,<sup>a</sup> Feng Yan,<sup>b,\*</sup> and Min Gu<sup>a,\*</sup>*

<sup>a</sup>National Laboratory of Solid State Microstructures and Department of Physics,  
Collaborative Innovation Center of Advanced Microstructures, Nanjing University,  
Nanjing 210093, P.R. China

<sup>b</sup>Department of Applied Physics, the Hong Kong Polytechnic University Hung Hom,  
Kowloon, Hong Kong

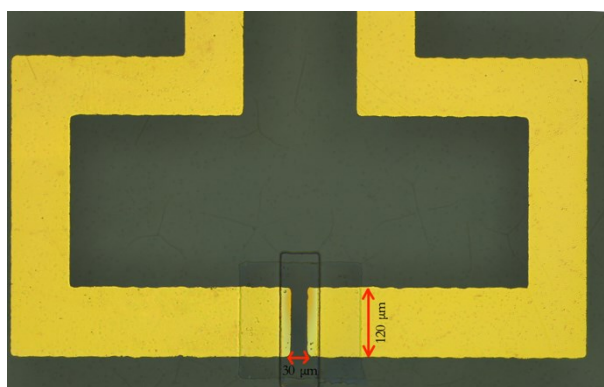

**Fig. S1** The channel of the sensor.

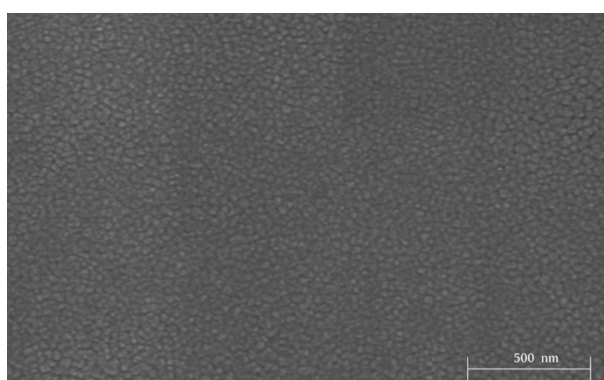

**Fig. S2** Nano-Au particles were electro-deposited on the surface of an Au electrode with a 30 s deposition time.

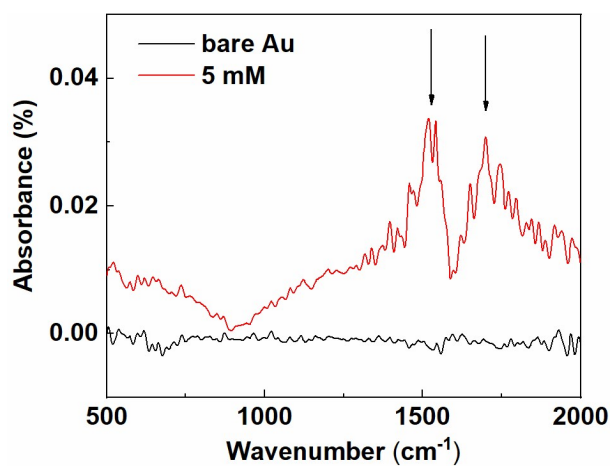

**Fig. S3** ATR-FTIR spectra.

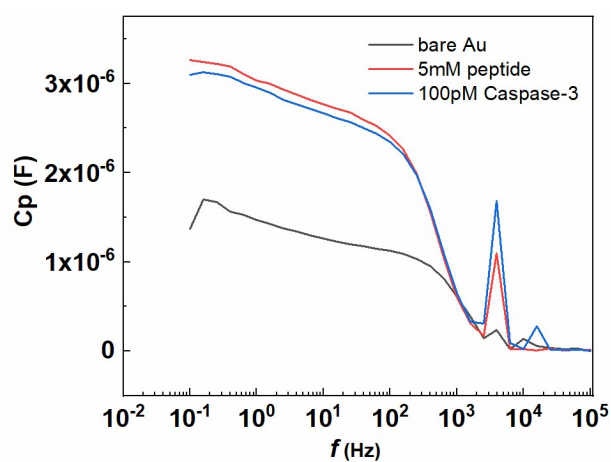

**Fig. S4** Capacitance for GE in PBS solution. Results were recorded at bare Au electrode, after immobilization of peptide, after cleaved by caspase-3. Applied potential: -0.2 V (vs. Ag/AgCl), with a 10 mV a.c. voltage. Frequency range:  $10^{-1}$  Hz– $10^5$  Hz.

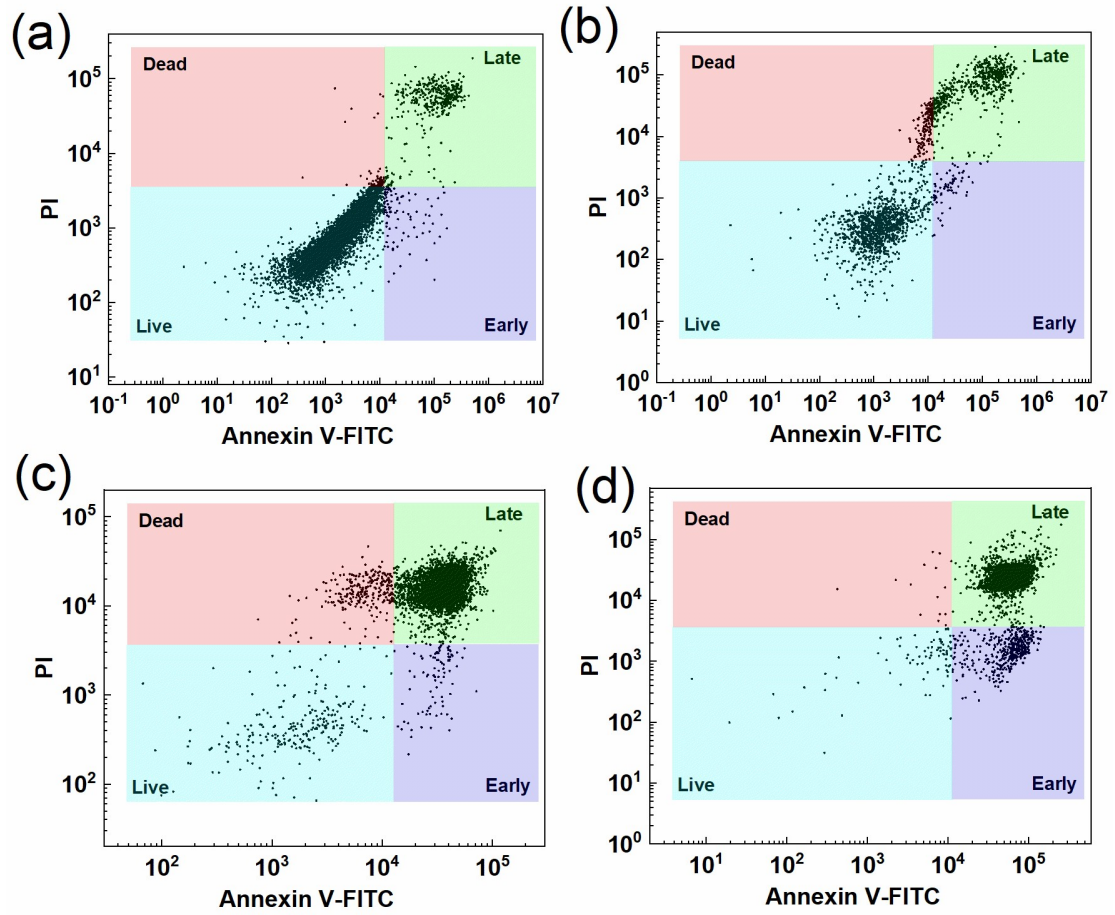

**Fig. S5** Flow cytometry of HeLa cells after treatment with different volumes of apoptosis inducer (a) 0  $\mu\text{L}$  (b) 0.1  $\mu\text{L}$  (c) 0.5  $\mu\text{L}$  and (d) 0.8  $\mu\text{L}$
